# Supplementary material for: FAM83D associates with high tumor recurrence after liver transplantation involving expansion of CD44+ carcinoma stem cells
Source: PubMed Central journal article supplement (PMC5363599; doi:10.18632/oncotarget.12715), 2016-10-18
Supplement: oncotarget-07-77495-s001.pdf [file oncotarget-07-77495-s001.pdf]

## FAM83D associates with high tumor recurrence after liver transplantation involving expansion of CD44<sup>+</sup> carcinoma stem cells

### SUPPLEMENTARY FIGURE AND TABLE

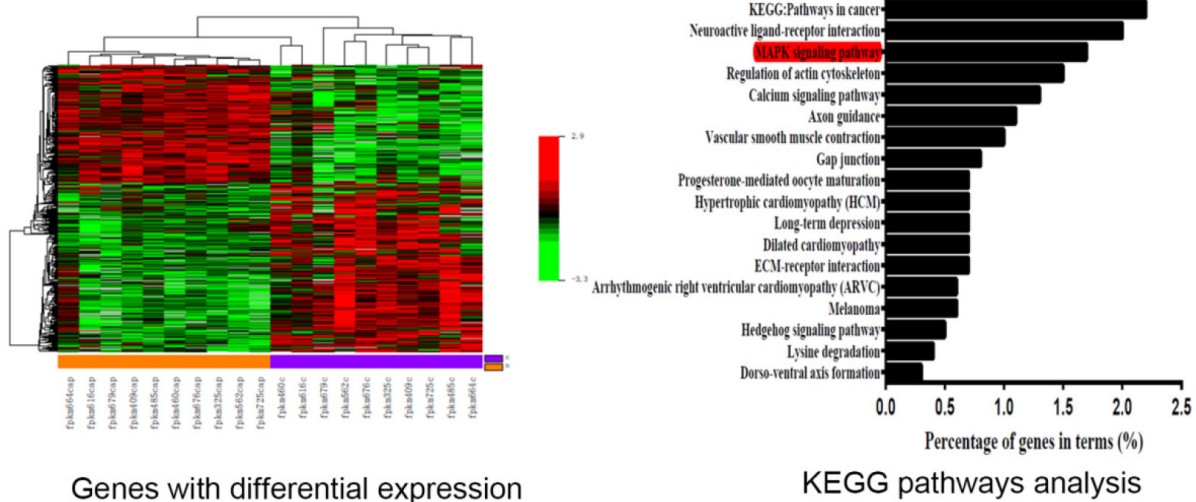

**Supplementary Figure S1: The 10 pairs of HCC and corresponding non-HCC tissues (no pre-LT therapy) were treated with RNA sequence.** The mRNA with differential expression were profiled, and found that 321 up-regulated genes and 223 down-regulated genes (>2 folds,  $P < 0.01$ ). By pathway analysis, we defined the MAPK pathways is the most important cancer related signaling pathways in HCC initiation and development. Among the 544 genes, FAM83D was increased in 8/10 HCC tissues compared with adjacent liver tissues.

**Supplementary Table S1: The nucleotide sequences of each primer**

| <b>Genes</b>          | <b>Sequence</b>               |
|-----------------------|-------------------------------|
| CD133 forward         | CACTCTATAACCAAAGCGTCAA        |
| CD133 reverse         | CACGATGCCACTTTCTCAC           |
| CD90 forward          | GACCCGTGAGACAAAGAAGCA         |
| CD90 reverse          | GAGGAGATGGGTGGGGAAT           |
| CD44 forward          | G TTCCTGGACTGATTTCTTC         |
| CD44 reverse          | ATTACTCTGCTGCGTTGTC           |
| EPCAM forward         | GTTGTTGCTGGAATTGTTGT          |
| EPCAM reverse         | CATCTCACCCATCTCCTTTAT         |
| CD13 forward          | GCCACCTCTACCATCATCAGC         |
| CD13 reverse          | TGTTTCCTCGTTGTCCTTCTTG        |
| CD24 forward          | GCTCCTACCCACGCAGATTT          |
| CD24 reverse          | CCTTGGTGGTGGCATTAGTT          |
| Oct-4 forward         | TATTCAGCCAAACGACCATCT         |
| Oct-4 reverse         | ACGAGGGTTTCTGCTTTGC           |
| Nanog forward         | CCGAAGAATAGCAATGGTG           |
| Nanog reverse         | CCTGGTGGTAGGAAGAGTAAA         |
| Sox2 forward          | ATGGGTTTCGGTGGTCAAGTC         |
| Sox2 reverse          | GCTCTGGTAGTGCTGGGACAT         |
| ABCG2 forward         | ACTCAGTTTATCCGTGGTGTG         |
| ABCG2 reverse         | CCTGCTTAGACATCCTTTTCA         |
| GPC3 forward          | AAATACCAACTAACAGCACGAT        |
| GPC3 reverse          | ATTCACCCACAAACTCAAAA          |
| CD44s-sense           | AAG ACA TCT ACC CCA GCA AC    |
| CD44v3-sense          | ACG TCT TCA AAT ACC ATC TC    |
| CD44v6-sense          | CAG GCA ACT CCT AGT AGT AC    |
| CD44v7-sense          | CAG CCT CAG CTC ATA CCA GC    |
| CD44v9-sense          | CAG AGC TTC TCT ACA TCA CA    |
| CD44s-antisense       | CCA AGA TGA TCA GCC ATT CTG G |
| Homo-FAM83D (forward) | AGTTCCGAATCCTGTATGCC          |
| Homo-FAM83D (reverse) | GCTCCTTGGACTGTGGTTT           |
